# Supplementary material
Source: Copernicus journal article supplement (doi:10.5194/egusphere-2026-2824)
Supplement: Supplementary file 1 [file egusphere-2026-2824-supplement.pdf]

1 *Supplement of*  
2 **Three-dimensional atmospheric circulation teleconnections in**  
3 **the Northern Hemisphere**

4 Haihong Yang<sup>1</sup>, Shujuan Hu<sup>1,2</sup>, Jianjun Peng<sup>3</sup> Wenxin Zhang<sup>1</sup>, Zihan Hao<sup>1</sup>, Yuchen Wu<sup>1</sup>, and  
5 Zhiwei Zhu<sup>4</sup>

6 <sup>1</sup> College of Atmospheric Sciences, Lanzhou University, Lanzhou730000, China

7 <sup>2</sup> Collaborative Innovation Center for Western Ecological Safety, Lanzhou University, Lanzhou, China

8 <sup>3</sup> State Key Laboratory of Tropical Oceanography, South China Sea Institute of Oceanology, Chinese Academy of  
9 Sciences, Guangzhou, China

10 <sup>4</sup> State Key Laboratory of Climate System Prediction and Risk Management/Key Laboratory of Meteorological  
11 Disaster, Ministry of Education/Collaborative Innovation Center on Forecast and Evaluation of Meteorological  
12 Disasters, Nanjing University of Information Science and Technology, Nanjing 210044, China

## 13 **Methods**

### 14 **Three-pattern decomposition of global atmospheric circulation (3P-DGAC)**

15 To achieve a more objective and realistic representation of atmospheric circulation, [Hu et al.](#)  
16 [\(2017, 2018a, b, 2020\)](#) developed a novel method called the three-pattern decomposition of global  
17 atmospheric circulation (3P-DGAC), which dynamically treats the actual atmosphere as an  
18 integrated system. In contrast to traditional two-dimensional (2D) decomposition techniques that  
19 neglect vertical motion in mid- to high-latitudes and horizontal vortex dynamics in low latitudes,  
20 3P-DGAC accounts for these processes, enabling a more complete diagnosis of real atmospheric  
21 dynamics. Specifically, this method generalizes mid-latitude Rossby wave activity as well as  
22 Hadley and Walker circulations in the tropics to a global framework. It conceptualizes atmospheric  
23 circulation as a superposition of three components: horizontal vortex, meridional, and zonal  
24 circulations. Furthermore, 3P-DGAC quantitatively separates the three-dimensional (3D) vertical  
25 vorticity into horizontal rotational and divergent parts, thereby improving the consistency with  
26 observed atmospheric behavior. It defines three stream functions corresponding to three  
27 orthogonal planes—horizontal circulation in the horizontal plane, meridional circulation in the  
28 meridional vertical plane, and zonal circulation in the zonal vertical plane. **For clarity, we adopt**  
29 **the notations  $\psi_\sigma$ ,  $\psi_\lambda$ , and  $\psi_\phi$  to replace the original R, H, and W stream functions**[\(Hu et al.](#)  
30 [2017, 2018a, b\)](#). This decomposition technique has been increasingly applied in studies of  
31 abnormal weather and climate events to construct physically meaningful mechanism frameworks  
32 [\(Peng et al. 2023, 2024; Zhou et al. 2023; Hu et al. 2025\)](#). In this study, we present only a brief  
33 summary of the key steps involved in 3P-DGAC for simplicity.

34 To resolve the unit inconsistency associated with 3D vorticity calculations in the pressure ( $p$ )  
35 coordinate system, the 3P-DGAC adopts a spherical sigma ( $\sigma$ ) coordinate framework. For broader  
36 applicability, the transformation from  $\sigma$ -coordinates to  $p$ -coordinates is approximated as follows:

$$37 \quad u' = \frac{u}{a}, \quad v' = \frac{v}{a}, \quad \dot{\sigma} = \frac{\omega}{P_s}, \quad \sigma = \frac{p}{P_s}, \quad (1)$$

38 where  $a$  is the radius of the earth,  $p$  is the pressure, and  $P_s = 1000$  hPa is the sea level pressure.  
39  $(u, v, \omega)$  and  $(u', v', \dot{\sigma})$  denote the three velocity components in the spherical  $p$ -coordinate  
40 system and spherical  $\sigma$ -coordinate system, respectively. Typically, we employ formula (1) to  
41 convert variables from  $\sigma$ -coordinate to  $p$ -coordinate.

42 According to the theory of the 3P-DGAC, the stream functions  $\psi_\sigma$ ,  $\psi_\lambda$ , and  $\psi_\phi$  are defined  
 43 in the spherical  $\sigma$ -coordinate system as follows:

$$44 \quad \begin{cases} \Delta_3 \psi_\sigma = \Delta_2 \psi_\sigma + \frac{\partial^2 \psi_\sigma}{\partial \sigma^2} = \zeta, \\ \psi_\lambda = \int_0^\sigma \left( \frac{1}{\sin \theta} \frac{\partial \psi_\sigma}{\partial \lambda} - v' \right) d\sigma = \int_0^\sigma (v'_\sigma - v') d\sigma = - \int_0^\sigma v'_\lambda d\sigma, \\ \psi_\phi = \int_0^\sigma \left( \frac{\partial \psi_\sigma}{\partial \theta} + u' \right) d\sigma = \int_0^\sigma (u' - u'_\sigma) d\sigma = \int_0^\sigma u'_\phi d\sigma. \end{cases} \quad (2)$$

45 Then, the components of atmospheric circulation in the 3P-DGAC model can be expressed  
 46 as

$$47 \quad \begin{cases} u' = u'_\phi + u'_\sigma = \frac{\partial \psi_\phi}{\partial \sigma} - \frac{\partial \psi_\sigma}{\partial \theta}, \\ v' = v'_\sigma + v'_\lambda = \frac{1}{\sin \theta} \frac{\partial \psi_\sigma}{\partial \lambda} - \frac{\partial \psi_\lambda}{\partial \sigma}, \\ \dot{\sigma} = \dot{\sigma}_\lambda + \dot{\sigma}_\phi = \frac{1}{\sin \theta} \frac{\partial (\sin \theta \psi_\lambda)}{\partial \theta} - \frac{1}{\sin \theta} \frac{\partial \psi_\phi}{\partial \lambda}. \end{cases} \quad (3)$$

48 Where  $\zeta = \frac{1}{\sin \theta} \frac{\partial v'}{\partial \lambda} - \frac{1}{\sin \theta} \frac{\partial (u' \sin \theta)}{\partial \theta} = \frac{1}{a \sin \theta} \frac{\partial v}{\partial \lambda} - \frac{1}{a \sin \theta} \frac{\partial (u \sin \theta)}{\partial \theta}$  represents the relative

49 vorticity of the actual atmosphere, which consists of two components, one arises from the  
 50 horizontal vortex motion and another is generated by the divergence of the large-scale vertical

51 circulations, they are denoted by  $\Delta_2 \psi_\sigma = \frac{1}{\sin \theta} \frac{\partial v'_\sigma}{\partial \lambda} - \frac{1}{\sin \theta} \frac{\partial u'_\sigma}{\partial \theta}$  and

52  $\frac{\partial^2 \psi_\sigma}{\partial \sigma^2} = \frac{1}{\sin \theta} \frac{\partial v'_\lambda}{\partial \lambda} - \frac{1}{\sin \theta} \frac{\partial u'_\phi \sin \theta}{\partial \theta}$ . Here  $\Delta_3 = \frac{1}{\sin^2 \theta} \frac{\partial^2}{\partial \lambda^2} + \frac{1}{\sin \theta} \frac{\partial}{\partial \theta} (\sin \theta \frac{\partial}{\partial \theta}) + \frac{\partial^2}{\partial \sigma^2}$  and

53  $\Delta_2 = \frac{1}{\sin^2 \theta} \frac{\partial^2}{\partial \lambda^2} + \frac{1}{\sin \theta} \frac{\partial}{\partial \theta} (\sin \theta \frac{\partial}{\partial \theta})$  are behalf of the 3D and 2D Laplace operators, respectively,

54 in the spherical  $\sigma$ -coordinate system;  $u'$  and  $v'$  are the horizontal velocities of the actual  
 55 atmosphere in the spherical  $\sigma$ -coordinate;  $\dot{\sigma}$  is the vertical velocity;  $(u'_\sigma, v'_\sigma)$ ,  $(u'_\phi, \dot{\sigma}_\phi)$  and

56  $(v'_\lambda, \dot{\sigma}_\lambda)$  are the velocities of the horizontal, zonal, and meridional circulations, respectively;  $\theta$

57 is the colatitude and  $\lambda$  is the longitude.

58 It's worth noting that when  $p = P_s$  (the sea level pressure), the velocity fields typically adhere  
59 to the following boundary conditions in the spherical  $p$ -coordinate system:

$$60 \quad \omega = 0, \quad \frac{\partial u}{\partial p} = 0, \quad \frac{\partial v}{\partial p} = 0. \quad (4)$$

61 Thus, when  $\sigma = 1$  in the spherical  $\sigma$ -coordinate system, the boundary conditions are expressed as:

$$62 \quad \dot{\sigma} = 0, \quad \frac{\partial u'}{\partial \sigma} = 0, \quad \frac{\partial v'}{\partial \sigma} = 0. \quad (5)$$

63 Based on the representing relationship between stream functions and the velocity fields (Eq. (3)),  
64 when  $\sigma = 1$ , the stream functions satisfy the following boundary conditions:

$$65 \quad \psi_\lambda = \psi_\phi = 0, \quad \frac{\partial \psi_\sigma}{\partial \sigma} = 0. \quad (6)$$

66 Then, using the boundary conditions (6), we can solve the equations (2) to obtain the stream  
67 functions  $\psi_\lambda$ ,  $\psi_\phi$ ,  $\psi_\sigma$  and the velocity fields of the three circulations, which leads to the 3P-  
68 DGAC. It should be noted in particular that in this study, all the decomposed velocities  
69 computed by the 3P-DGAC are converted to the expression in  $p$ -coordinate via formula (1).  
70 Additional details on the 3P-DGAC method can be found from [Hu et al. \(2017, 2018a, b\)](#).

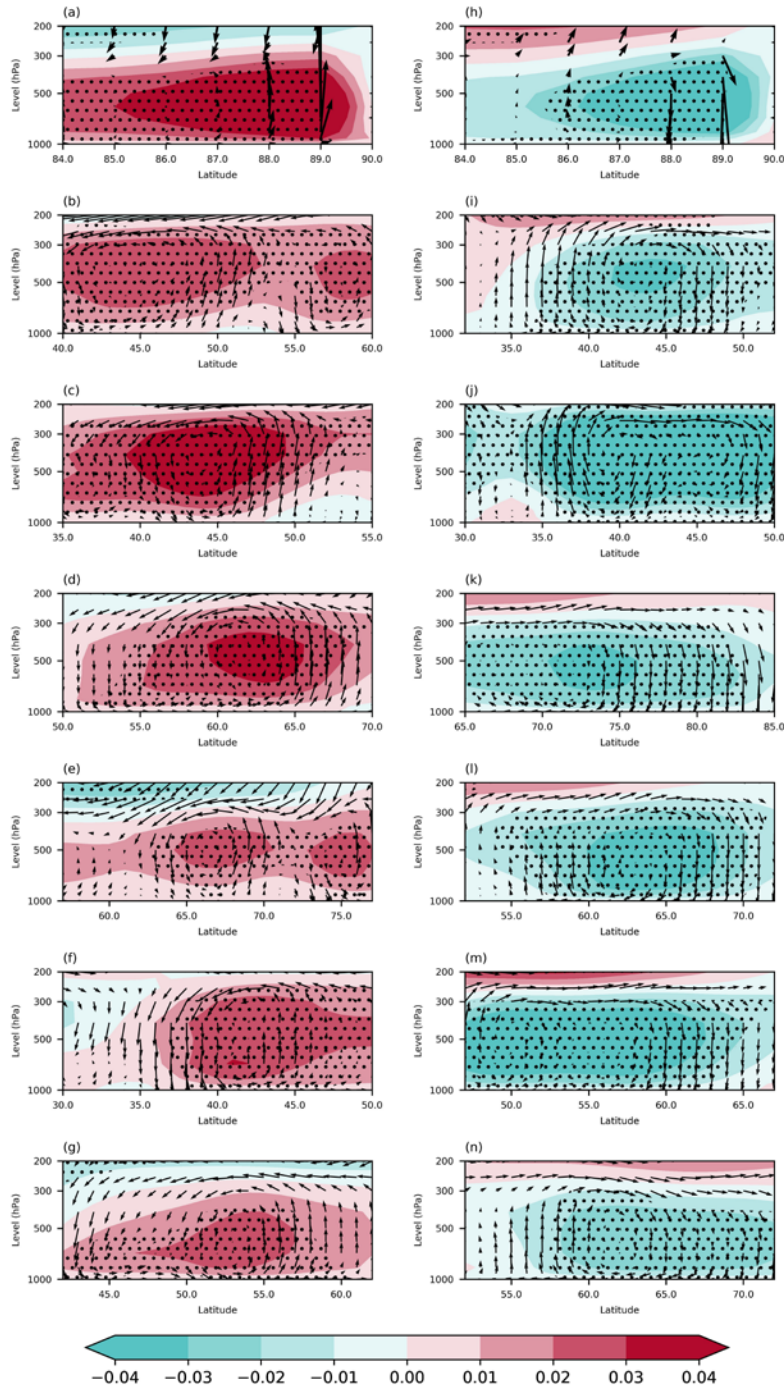

72  
 73 **Figure S1. Meridional vertical circulation teleconnection patterns: a pair of counter-rotating local**  
 74 **meridional vertical circulations. (a)-(g) Regressions of stream function  $H$  (shading units:  $10^{-6} \text{m}^{-1}$ ) of**  
 75 **meridional circulation along the meridional cross-sections at the pole A of HP (HCB, HCST, HSK, HGS,**  
 76 **HBA, and HUB) onto HPI (HCBI, HCSTI, HSKI, HGSI, HBAI, and HUBI) during the summer for the**  
 77 **period of 1979-2022. The data are detrended before analysis, and the areas significant at the 95%**  
 78 **confidence level are dotted. (h)-(n) As in (a)-(g), but for the pole B of HP, HCB, HCST, HSK, HGS, HBA,**  
 79 **and HUB.**

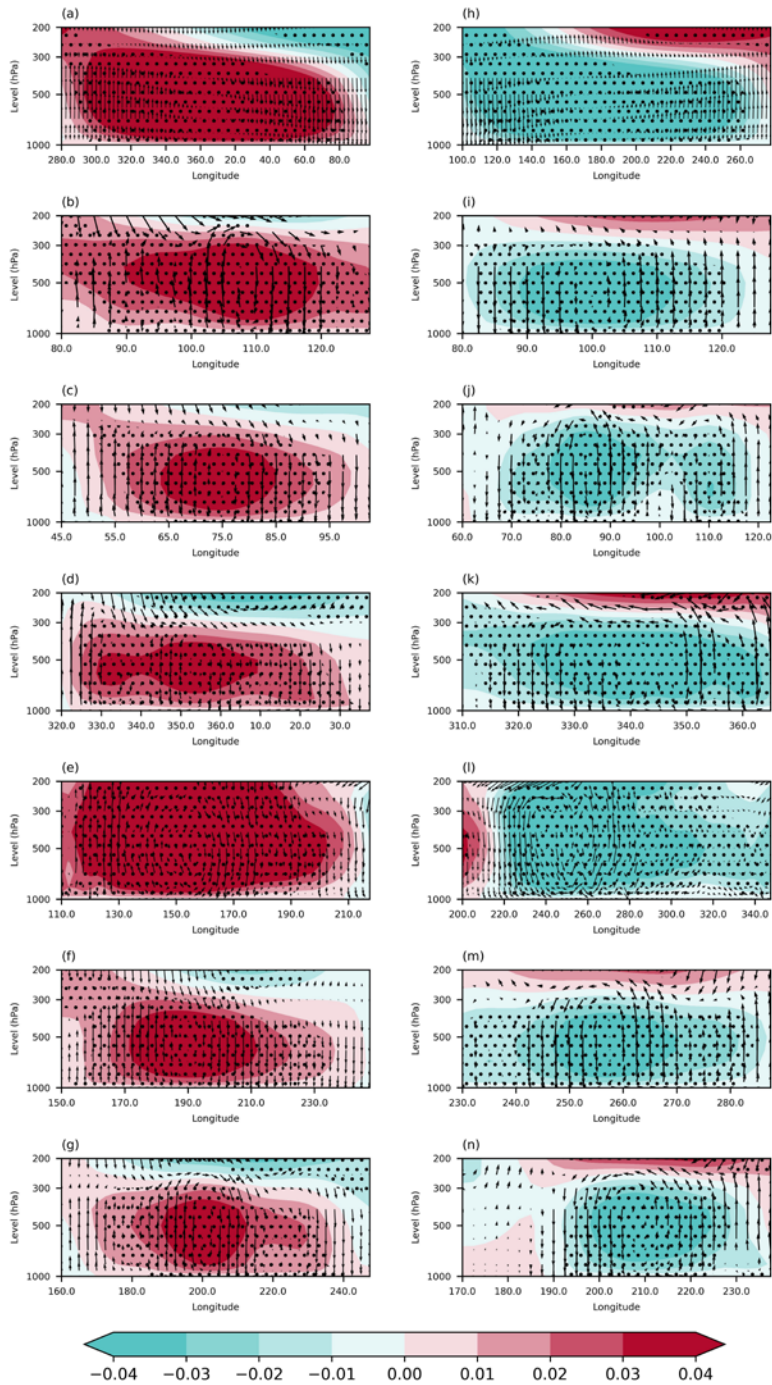

80  
 81 **Figure S2. Zonal vertical circulation teleconnection patterns: a pair of counter-rotating local Zonal**  
 82 **vertical circulations. (a)-(g) Regressions of stream function  $W$  (shading units:  $10^{-6} \text{m}^{-1}$ ) of zonal**  
 83 **circulation along the zonal cross-sections at the pole A of WP (WMCS, WGA, WOM, WWSJ, WCV, and**  
 84 **WBA) onto WPI (WMCSI, WGAI, WOMI, WWSJI, WCVI, and WBAI) during the summer for the**  
 85 **period of 1979-2022. The data are detrended before analysis, and the areas significant at the 95%**  
 86 **confidence level are dotted. (h)-(n) As in (a)-(g), but for the pole B of WP, WMCS, WGA, WOM, WWSJ,**  
 87 **WCV, and WBAI**

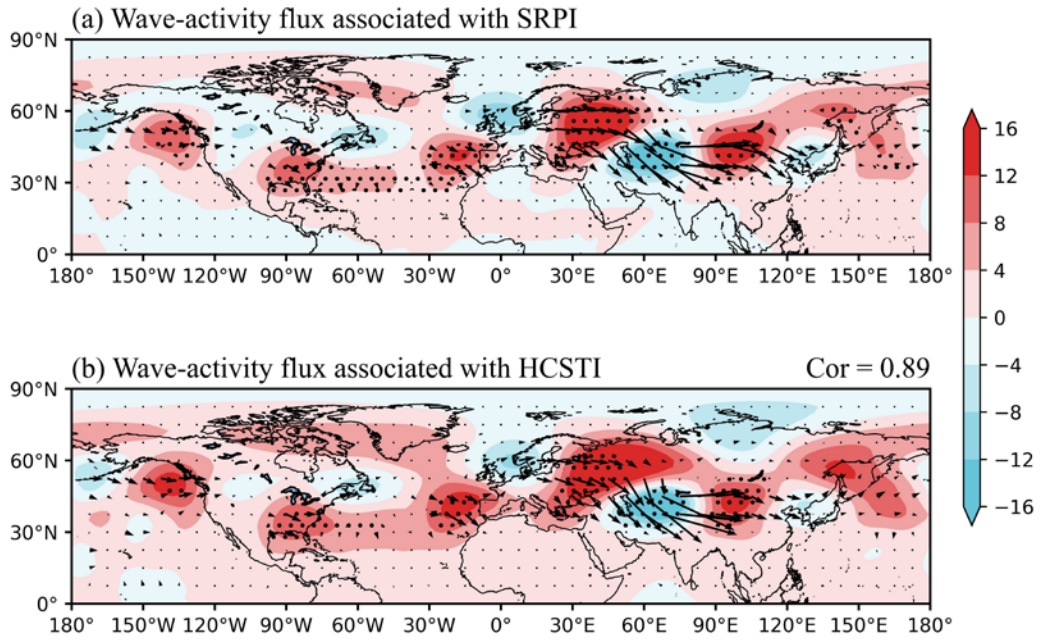

88  
 89 **Figure S3. Wave-activity flux associated with SRPI and HCSTI. (a) Regressed summer 200-hPa GHT**  
 90 **anomalies (shading, units: gpm) onto Silk-Road pattern index for the period of 1979-2022. The horizontal**  
 91 **wave-activity fluxes associated with Silk-Road pattern (black arrow, units:  $10^{-1} \text{ m}^2 \text{ s}^{-2}$ ).** (b) As in (a), but  
 92 **for Caspian Sea-Tarim pattern. The correlation coefficient during 1979-2022 between SRPI and HCSTI**  
 93 **is also shown in the figure, which in bold represents it was significant at the 99% confidence level.**

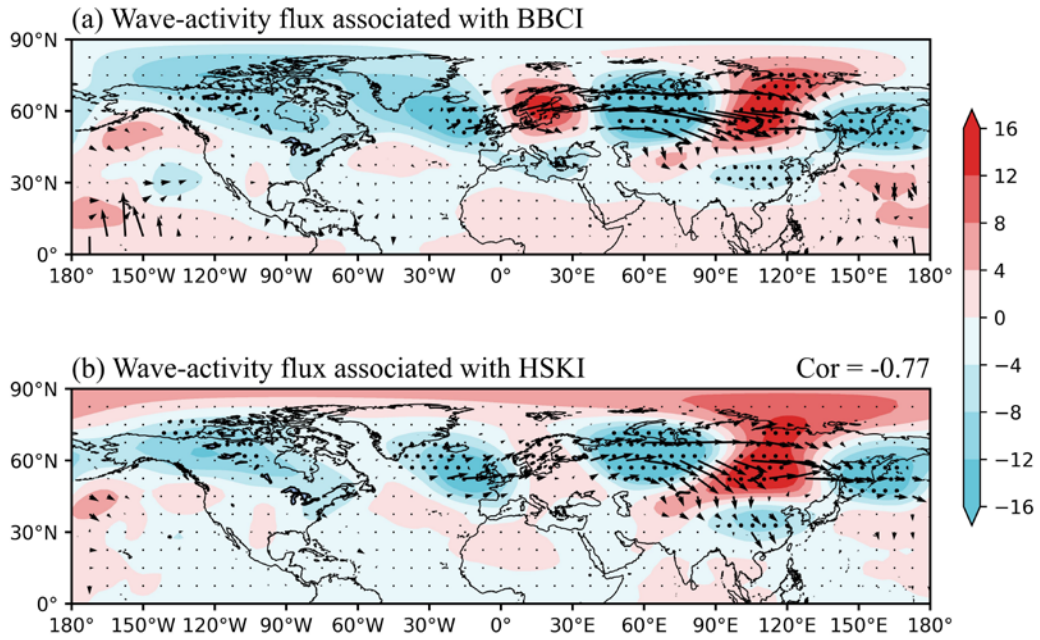

94

95 **Figure S4. Wave-activity flux associated with BBCI and HSKI. (a) Regressed summer 200-hPa GHT**  
 96 **anomalies (shading, units:  $\text{gpm}$ ) onto the British–Baikal Corridor Pattern index (BBCI) for the period of**  
 97 **1979–2022. The horizontal wave-activity fluxes associated with the British–Baikal Corridor Pattern are**  
 98 **shown (black arrows, units:  $10^{-1} \text{ m}^2 \text{ s}^{-2}$ ).** (b) As in (a), but for the Central Siberian Plateau–Kara Sea  
 99 **Pattern. For ease of comparison, (b) shows the regression of the negative HSKI. The correlation coefficient**  
 100 **between BBCI and HSKI during 1979–2022 is also shown in the figure, with bold values indicating**  
 101 **significance at the 99% confidence level.**

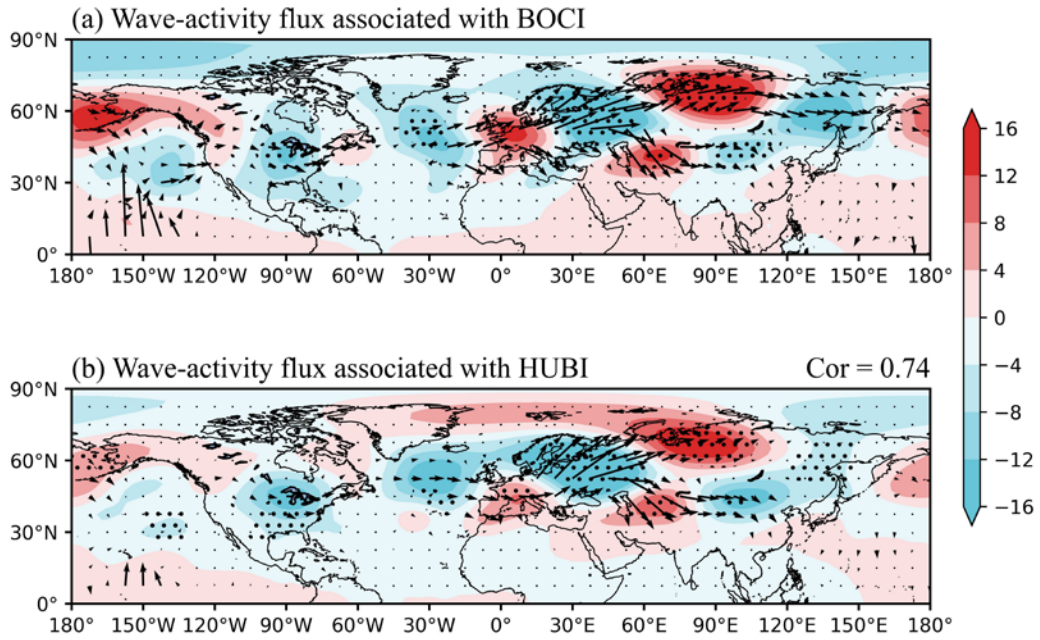

102  
 103 **Figure S1. Wave-activity flux associated with BOCI and HUBI. (a) Regressed summer 200-hPa GHT**  
 104 **anomalies (shading, units:  $\text{gpm}$ ) onto BOCI for the period of 1979-2022. The horizontal wave-activity**  
 105 **fluxes associated with British-Okhotsk Corridor pattern (black arrow, units:  $10^{-1} \text{ m}^2 \text{ s}^{-2}$ ).** (b) As in (a), but  
 106 **for Baltic sea - Ural-Baltic pattern (HUB). the correlation coefficient during 1979-2022 between BOCI**  
 107 **and HUBI is also shown in the figure, which in bold represents it was significant at the 99% confidence**  
 108 **level.**

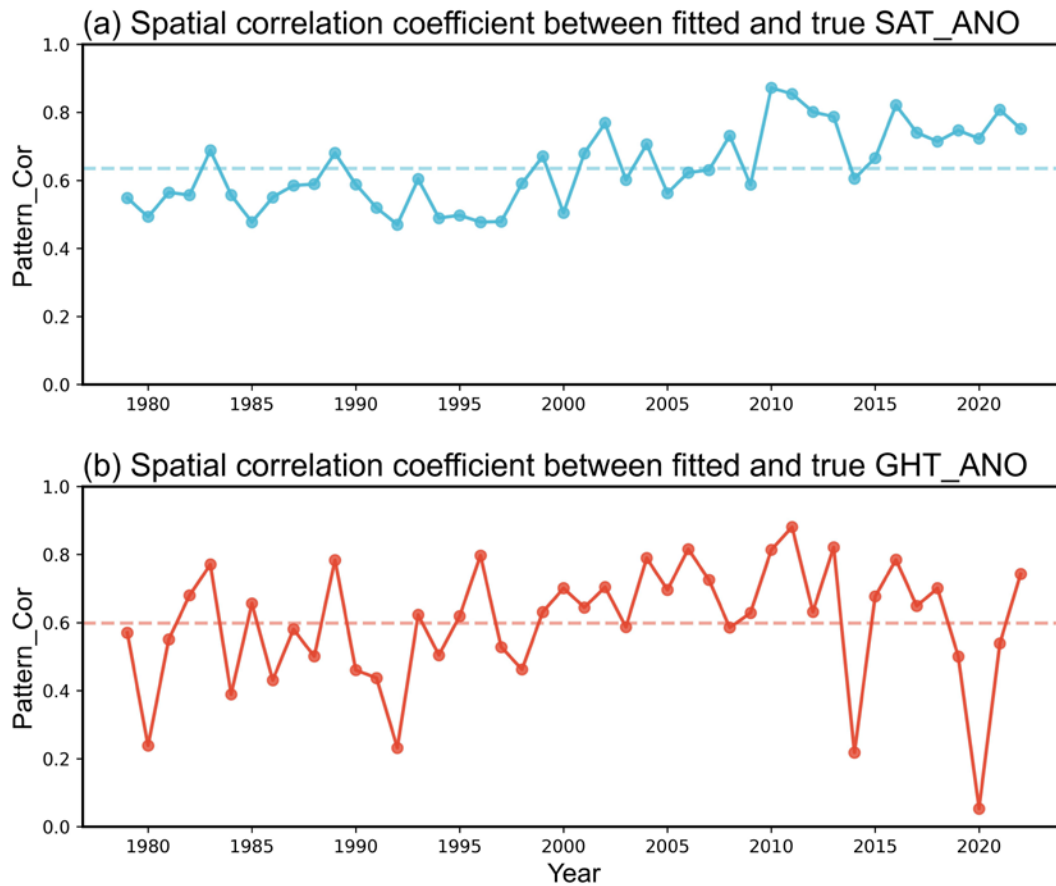

109  
 110 **Figure S6. Interannual Reconstruction Skill of Summer Climate Variability. (a) Time series of spatial**  
 111 **correlation coefficients between reconstructed and observed surface temperature anomalies for**  
 112 **Northern Hemisphere summers (1979–2022). (b) As in (a), but for geopotential height anomalies. Dashed**  
 113 **lines represent the multi-decadal average values.**  
 114

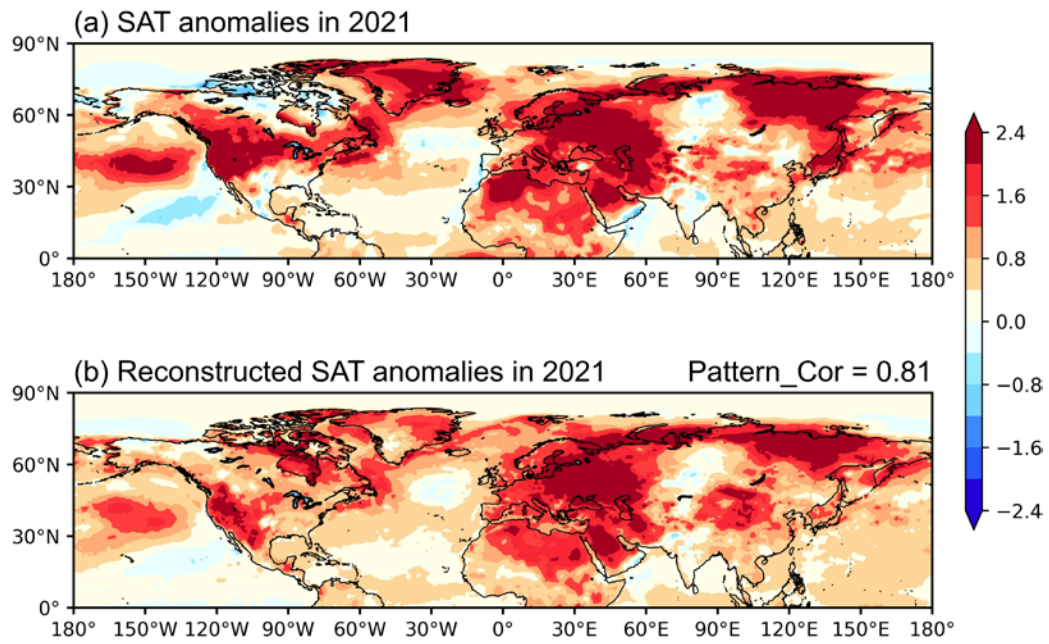

115  
116 **Figure S7. Combined effect of global warming and atmospheric circulation pattern on summer SAT of**  
117 **2021. (a) SAT anomalies (shading, units: °C) in the NH during the summers of 2021. (b) Reconstructed**  
118 **summer SAT anomalies (shading, units: °C) in the NH during the summers of 2021.**

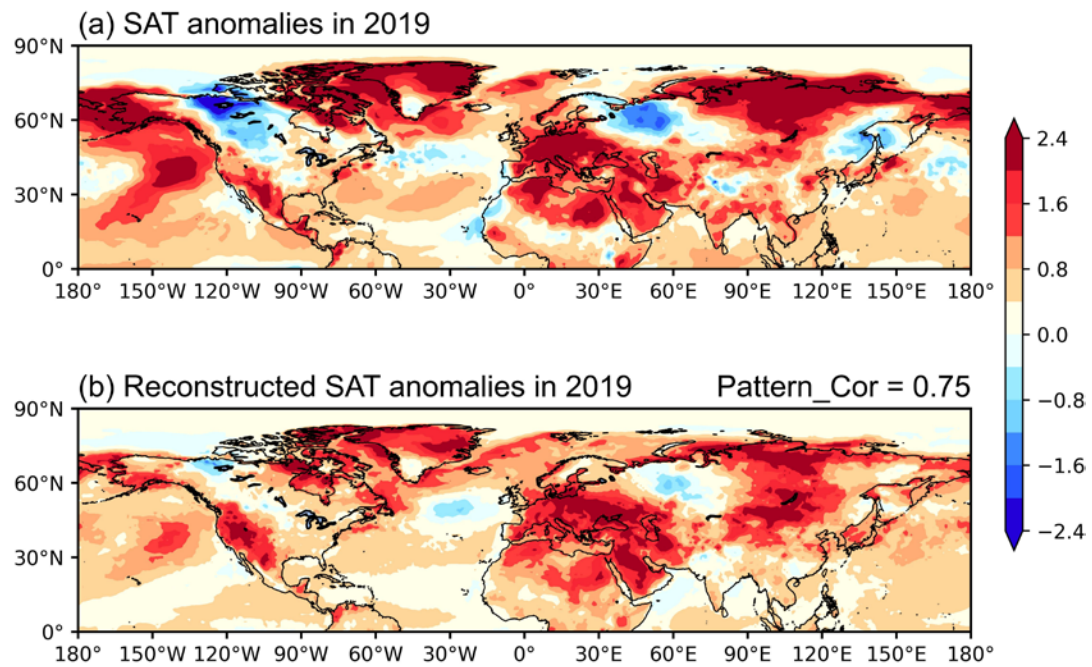

119  
 120 **Figure S8. Combined effect of global warming and atmospheric circulation pattern on summer SAT of**  
 121 **2019. (a) SAT anomalies (shading, units: °C) in the NH during the summers of 2019. (b) Reconstructed**  
 122 **summer SAT anomalies (shading, units: °C) in the NH during the summers of 2019.**

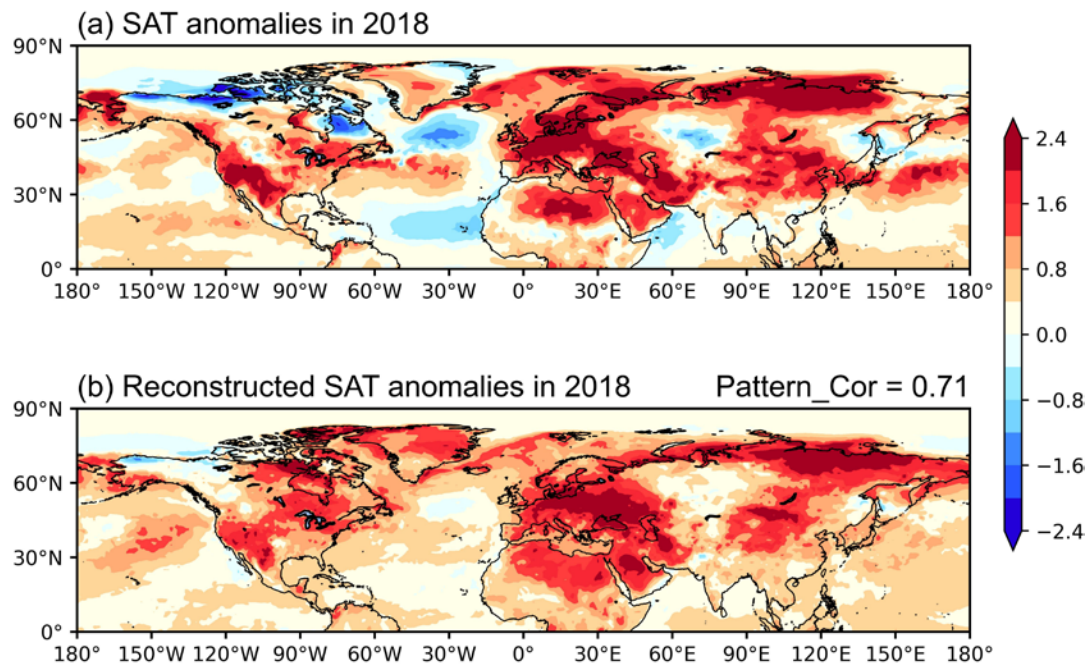

123  
 124 **Figure S9. Combined effect of global warming and atmospheric circulation pattern on summer SAT of**  
 125 **2018. (a) SAT anomalies (shading, units: °C) in the NH during the summers of 2018. (b) Reconstructed**  
 126 **summer SAT anomalies (shading, units: °C) in the NH during the summers of 2018.**

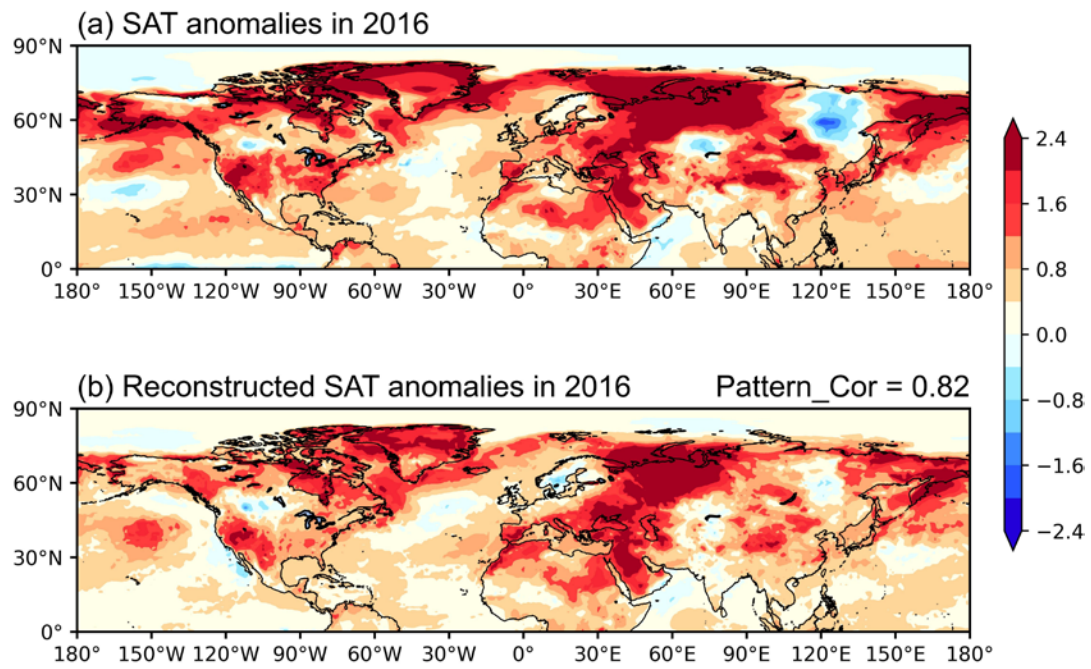

127  
 128 **Figure S10. Combined effect of global warming and atmospheric circulation pattern on summer SAT of**  
 129 **2016. (a) SAT anomalies (shading, units: °C) in the NH during the summers of 2016. (b) Reconstructed**  
 130 **summer SAT anomalies (shading, units: °C) in the NH during the summers of 2016.**

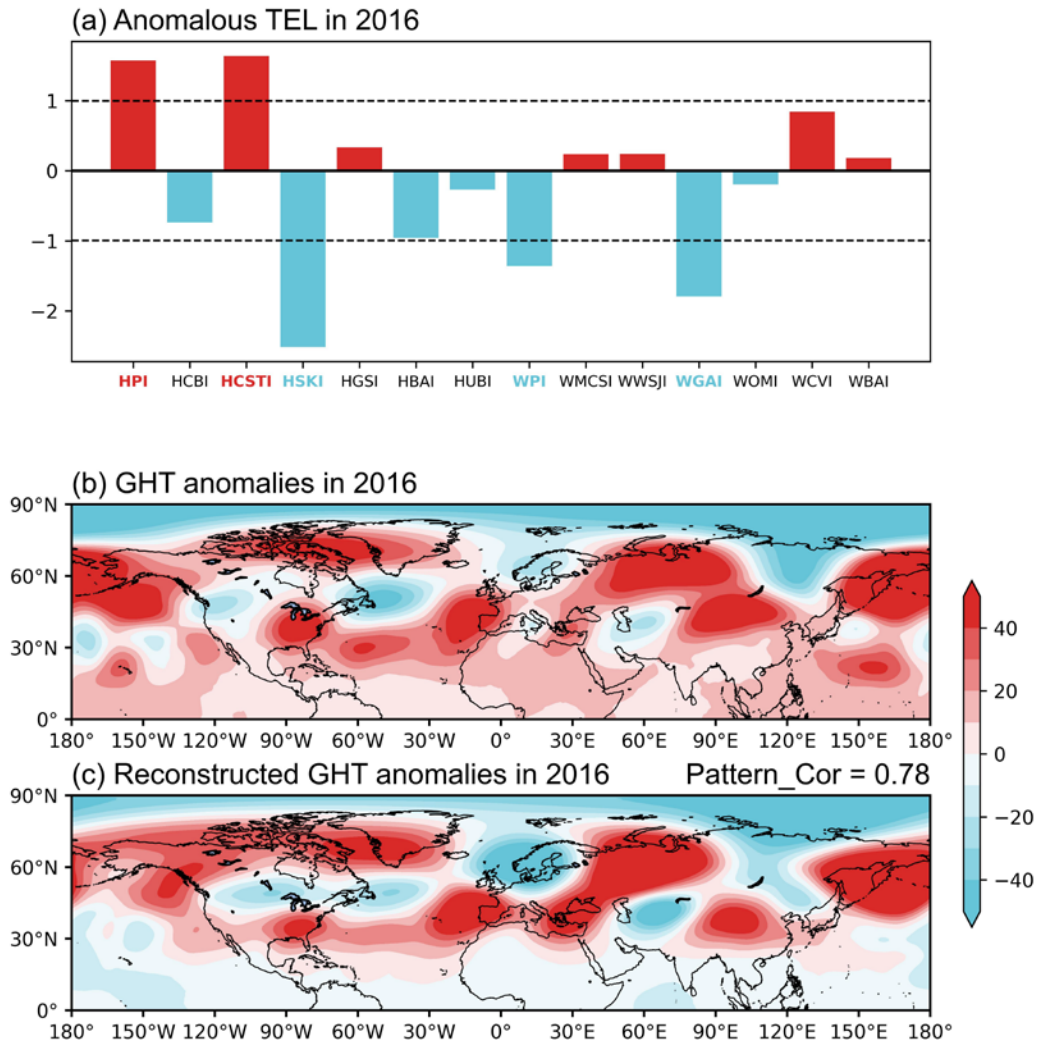

131  
 132 **Figure S11. Reconstructed circulation anomalies in 2016. (a) Indices of teleconnection patterns in 2016.**  
 133 **The dashed lines denote the reference line of the 1 standard deviation. (b) Summer GHT anomalies**  
 134 **(shading, units: gpm) in the NH during the summer of 2016. (c) Reconstructed Summer GHT anomalies**  
 135 **(shading, units: gpm) in the NH during the summers of 2016.**  
 136

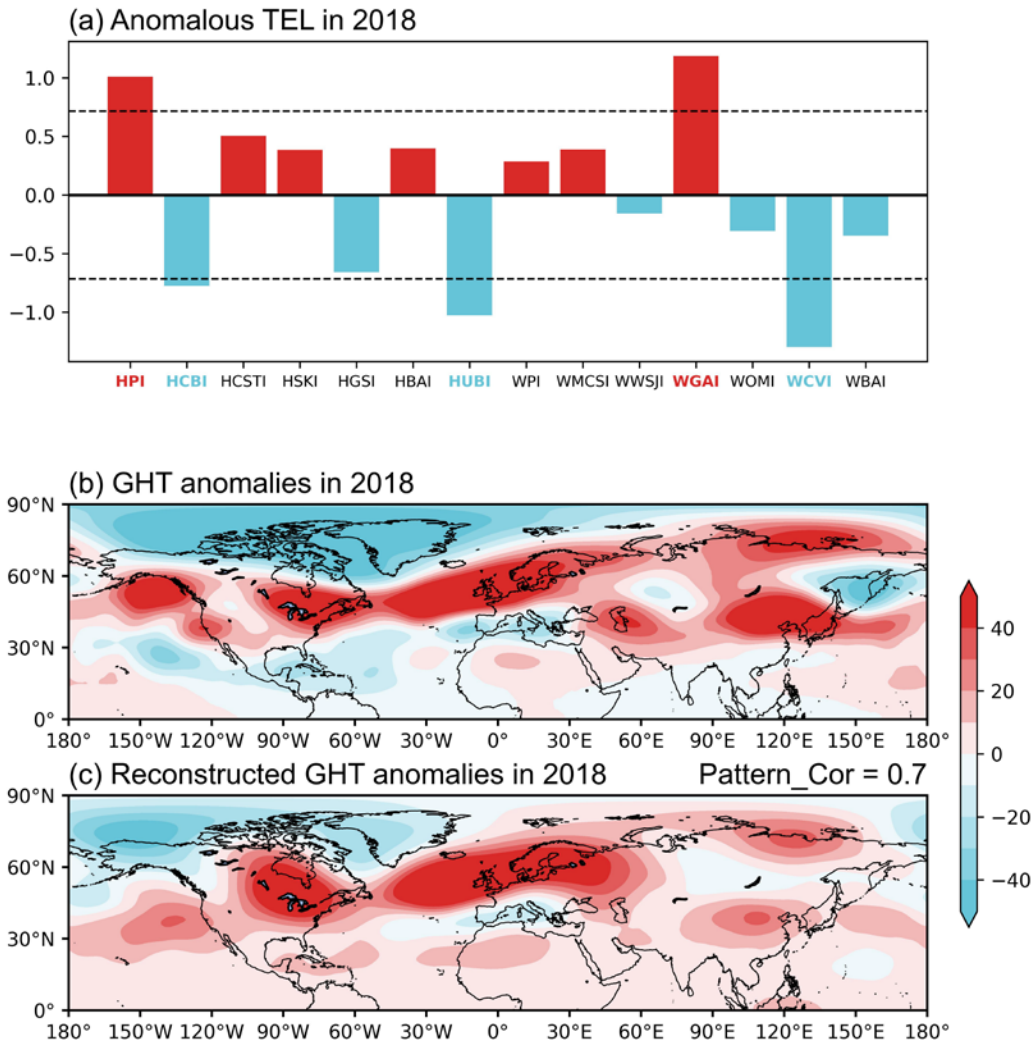

137  
 138 **Figure S12. Reconstructed circulation anomalies in 2018. (a) Indices of teleconnection patterns in 2018.**  
 139 **The dashed lines denote the reference line of the 1 standard deviation. (b) Summer GHT anomalies**  
 140 **(shading, units: gpm) in the NH during the summer of 2018. (c) Reconstructed Summer GHT anomalies**  
 141 **(shading, units: gpm) in the NH during the summers of 2018.**

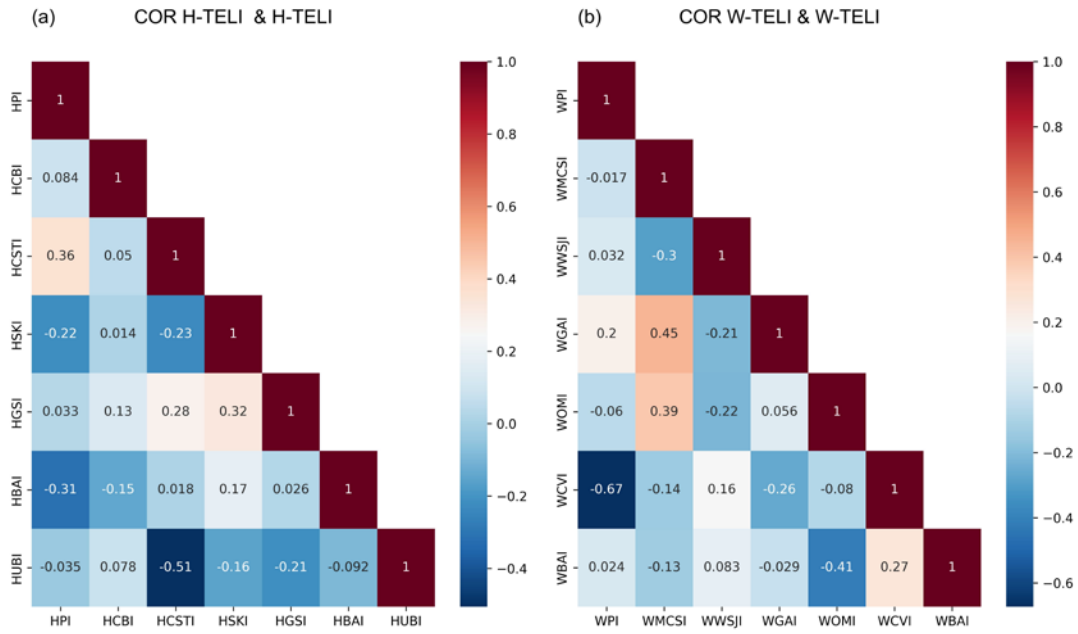

142  
 143 **Figure S13. Correlation heatmap of seven teleconnection indices. (a: HPI, HCBI, HCSTI, HSKI, HGSI,**  
 144 **HBAI, and HUBI. b: WPI, WMCSI, WGAI, WOMI, WWSJI, WCVI, and WBAI).**  
 145

146 **Tables**

147 **Table S1. Definition of the atmospheric circulation pattern indices.** HPI (HCBI, HCSTI,  
 148 HSKI, HGSI, HBAI, and HUBI) is abbreviation for Polar I pattern index (Canadian-Bermuda  
 149 pattern index, Caspian-Tarim pattern index, Kara Sea-West Siberian pattern index, Greenland-  
 150 Scandinavia pattern index, Black Sea-Aleutian pattern index, and Baltic-Ural pattern index and  
 151 Baltic sea- Ural mountain pattern index. The second and third columns show the regions (Pole A  
 152 and Pole B) used to define the atmospheric circulation pattern indices. The final column shows  
 153 correlation coefficients between the two poles of the atmospheric circulation patterns, and the  
 154 bold indicates significant at the 99.99% confidence level based on the Student's t-test.  
 155

| H-TEL | Pole A                   |              | Pole B                 |               | Cor(Pole A, Pole B)* |
|-------|--------------------------|--------------|------------------------|---------------|----------------------|
| HP    | North Pole               | (87.5, 87.5) | North Pole             | (265, 87.5)   | <b>-0.89</b>         |
| HCBI  | Canadian Plains          | (260, 50)    | Bermuda Island         | (292.5, 42.5) | <b>-0.76</b>         |
| HCST  | Caspian Sea              | (50, 45)     | Tarim Basin            | (82.5, 40)    | <b>-0.73</b>         |
| HSKI  | Central Siberian Plateau | (127.5, 60)  | Kara Sea               | (75, 80)      | <b>-0.71</b>         |
| HGSI  | Greenland island         | (320, 67.5)  | Scandinavian peninsula | (7.5, 62.5)   | <b>-0.68</b>         |
| HBAI  | Black Sea                | (30, 40)     | Aleutian islands       | (197.5, 57.5) | <b>-0.68</b>         |
| HUBI  | Baltic sea               | (17.5, 52.5) | Ural mountain          | (57.5, 62.5)  | <b>-0.67</b>         |

156  
 157

158 **Table S2. Definition of the atmospheric circulation pattern indices.** WPI (WMCSI, WGAI,  
 159 WOMI, WWSJI, WCVI, and WBAI) is abbreviation for Pole II pattern index (Mongolia-Central  
 160 Siberia pattern index, Greenland Sea-Azores pattern index, Ogasawara-Mexico pattern index,  
 161 West Siberian-Junggar pattern index, Chukchi Sea-Victoria pattern index, and Bering Strait-  
 162 Aleutian pattern index. The second and third columns show the regions (Pole A and Pole B) used  
 163 to define the atmospheric circulation pattern indices. The final column shows correlation  
 164 coefficients between the two poles of the atmospheric circulation patterns, and the bold indicates  
 165 significant at the 99.99% confidence level based on the Student's t-test.  
 166

| W-TEL | Pole A             |               | Pole B                 |               | Cor(Pole A, Pole B)* |
|-------|--------------------|---------------|------------------------|---------------|----------------------|
| WP    | North Pole         | (347.5, 87.5) | North Pole             | (167.5, 87.5) | <b>-0.90</b>         |
| WMCS  | Mongolian plateau  | (107.5, 42.5) | Central Siberian Plain | (100, 67.5)   | <b>-0.77</b>         |
| WGA   | Greenland sea      | (355, 70)     | Azores islands         | (340, 45)     | <b>-0.74</b>         |
| WOM   | Ogasawara Islands  | (155, 25)     | Gulf of Mexico         | (75, 80)      | <b>-0.76</b>         |
| WWSJ  | West Siberia plain | (77.5, 65)    | Junggar Basin          | (7.5, 62.5)   | <b>-0.75</b>         |
| WCV   | Chukchi Sea        | (187.5, 80)   | Victoria island        | (197.5, 57.5) | <b>-0.72</b>         |
| WBA   | Bering Strait      | (197.5, 70)   | Aleutian islands       | (57.5, 62.5)  | <b>-0.70</b>         |

167
